# Supplementary material for: An agentic multimodal AI framework for end-to-end breast cancer staging and biomarker profiling
Source: Research Square preprint supplement (doi:10.21203/rs.3.rs-8661837/v1), 2026-01-28
Supplement: Supplementary file 1 [file 4da527ad860911b472062ead.docx]

## Table S1 Pathology AUROC across tasks and CNN backbones.

## AUROC for pathology-only models across nine tasks and five backbones on the held-out set.

| task | ResNet | DenseNet | EfficientNet | RegNet | MobileNetV3 |
| --- | --- | --- | --- | --- | --- |
| Clinical staging | 0.652 | 0.678 | 0.65 | 0.722 | 0.612 |
| ER status | 0.75 | 0.663 | 0.665 | 0.614 | 0.6 |
| HER2 status | 0.783 | 0.748 | 0.747 | 0.779 | 0.739 |
| Histological grade | 0.93 | 0.864 | 0.95 | 0.854 | 0.865 |
| Ki-67 expression | 0.753 | 0.712 | 0.636 | 0.658 | 0.632 |
| M staging | 0.99 | 0.99 | 0.99 | 0.982 | 0.99 |
| N staging | 0.784 | 0.687 | 0.682 | 0.743 | 0.697 |
| PR status | 0.653 | 0.629 | 0.722 | 0.793 | 0.639 |
| T staging | 0.631 | 0.687 | 0.6 | 0.644 | 0.668 |

## Table S2 Imageology AUROC across tasks and CNN backbones.

## AUROC for imageology-only models across nine tasks and five backbones on the held-out set.

| task | ResNet | DenseNet | EfficientNet | RegNet | MobileNetV3 |
| --- | --- | --- | --- | --- | --- |
| Clinical staging | 0.654 | 0.665 | 0.735 | 0.6 | 0.654 |
| ER status | 0.776 | 0.635 | 0.662 | 0.67 | 0.6 |
| HER2 status | 0.81 | 0.662 | 0.654 | 0.6 | 0.6 |
| Histological grade | 0.844 | 0.862 | 0.85 | 0.949 | 0.748 |
| Ki-67 expression | 0.6 | 0.626 | 0.6 | 0.6 | 0.6 |
| M staging | 0.99 | 0.99 | 0.99 | 0.99 | 0.99 |
| N staging | 0.6 | 0.606 | 0.6 | 0.6 | 0.6 |
| PR status | 0.754 | 0.615 | 0.618 | 0.706 | 0.679 |
| T staging | 0.674 | 0.627 | 0.631 | 0.638 | 0.609 |
